# Supplementary material
Source: PubMed Central journal article supplement (PMC3899792)

Fig. 4c

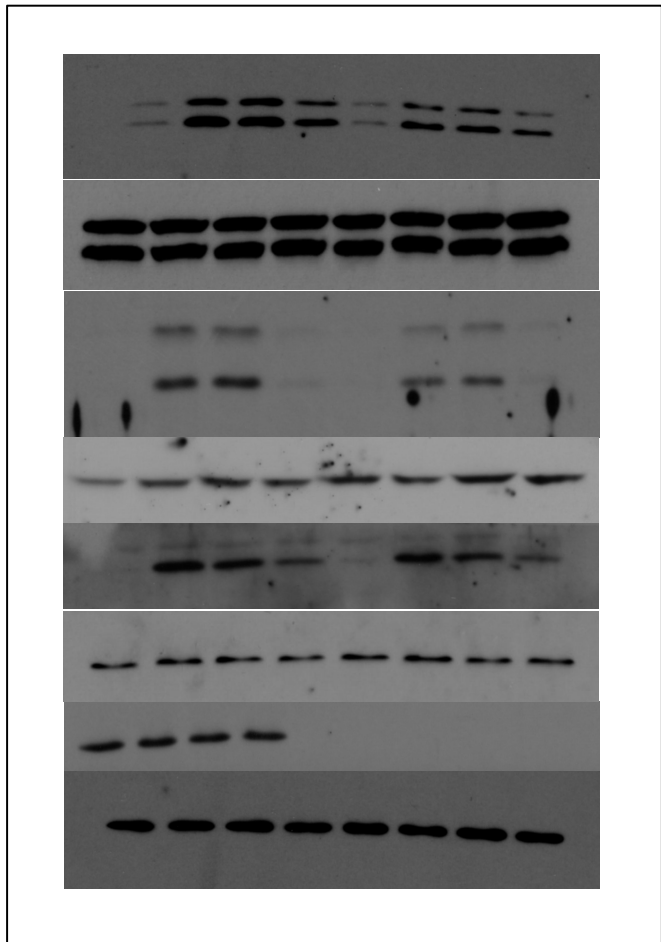

Fig. 4d

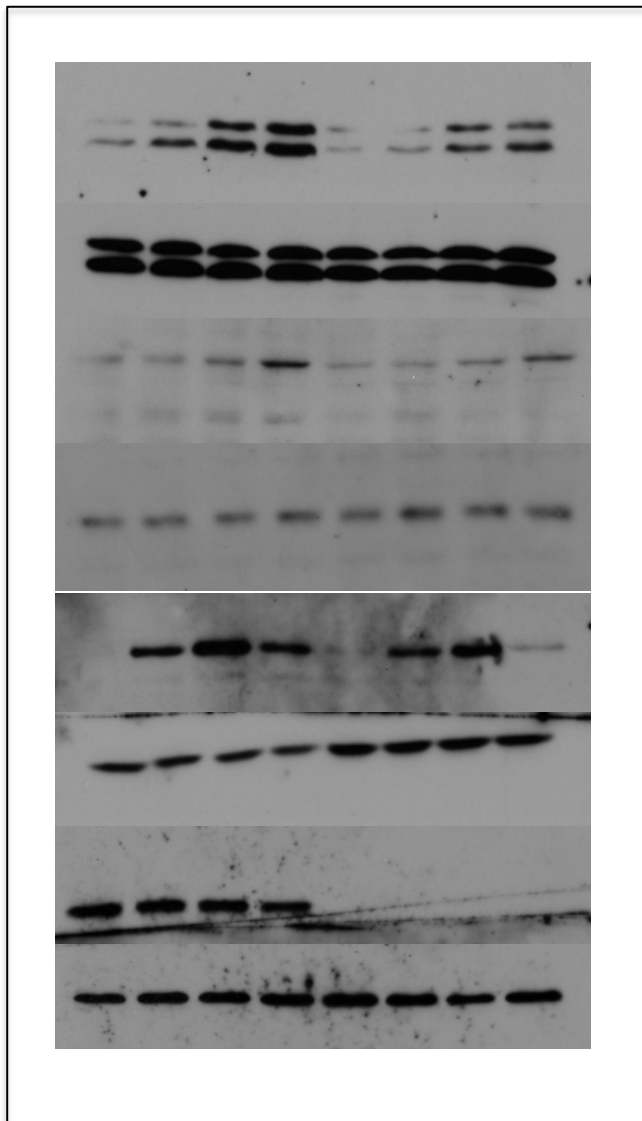

Fig. 5a

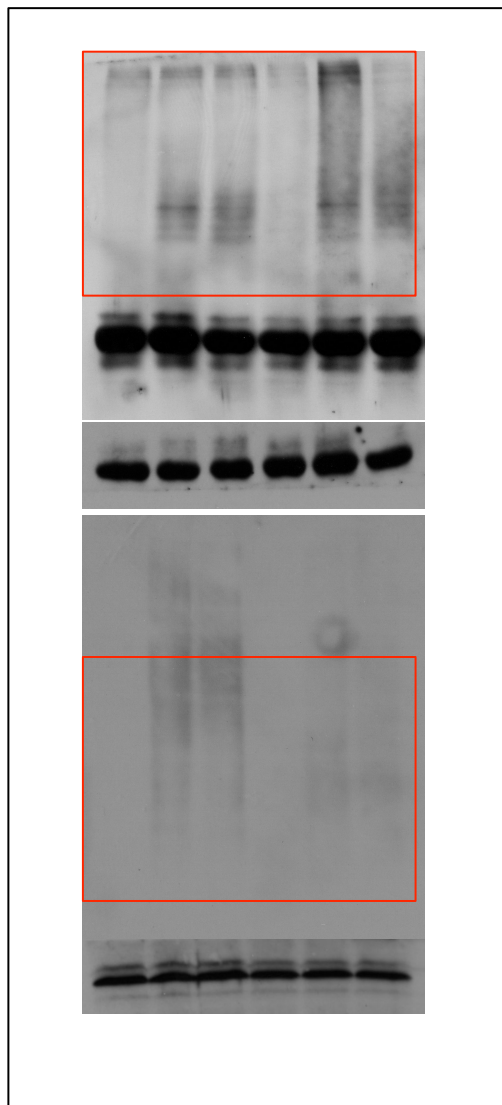

Fig. 5b

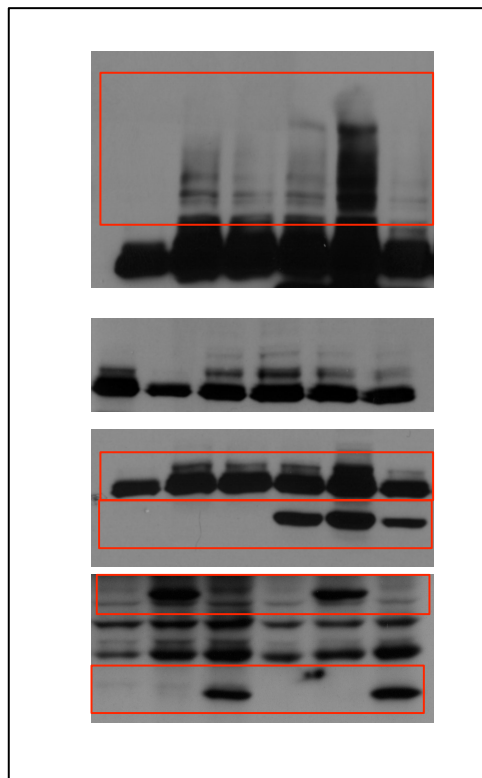

Fig. 5c

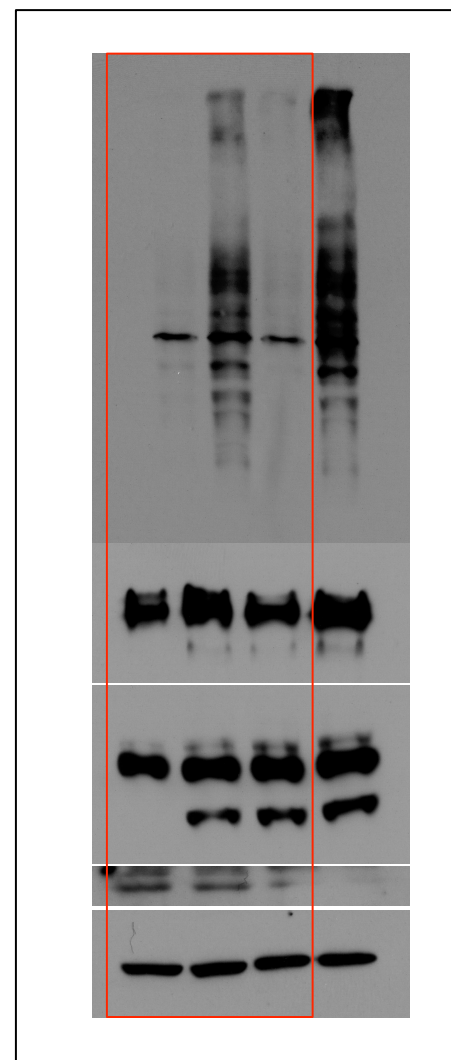

Fig. 5d

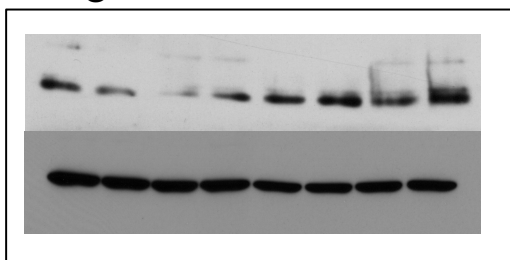

Fig. 5e

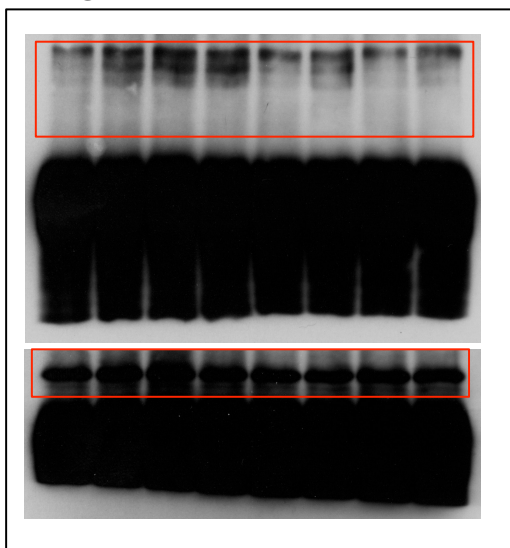

Fig. 5f

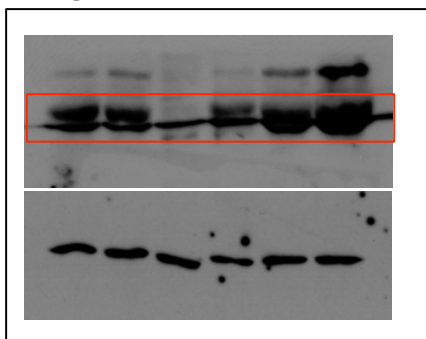

Fig. 5g

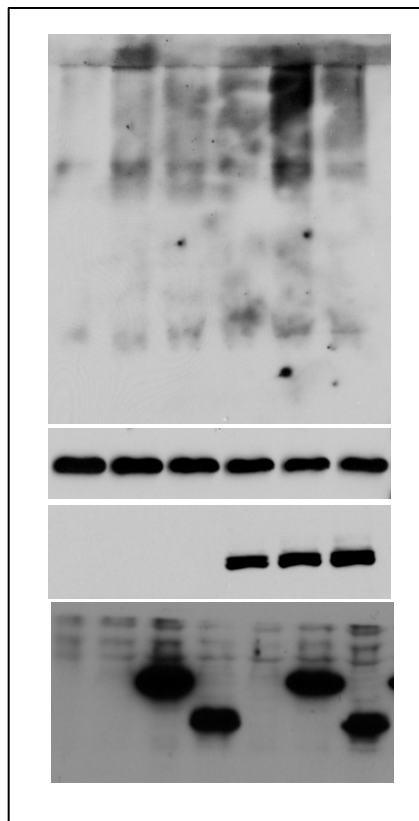

Fig. 5h

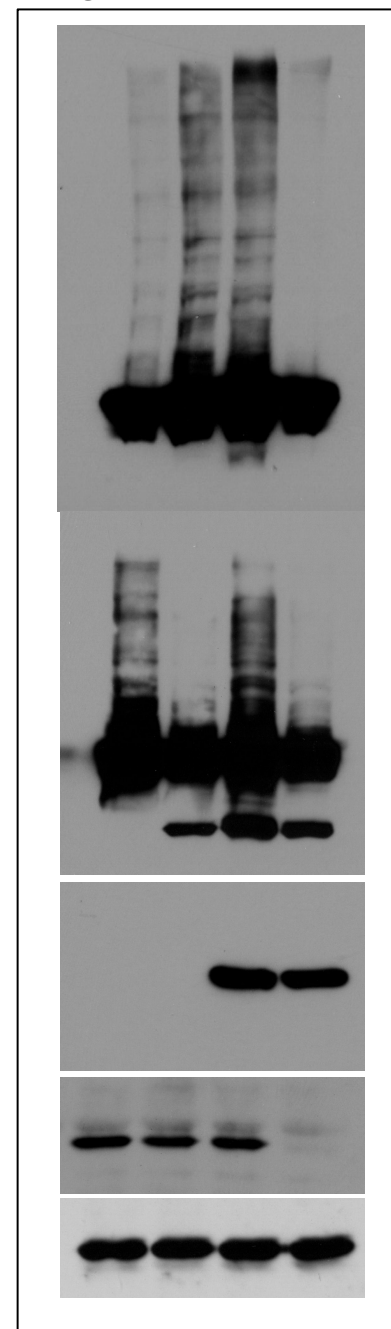

Supp Fig. 4a

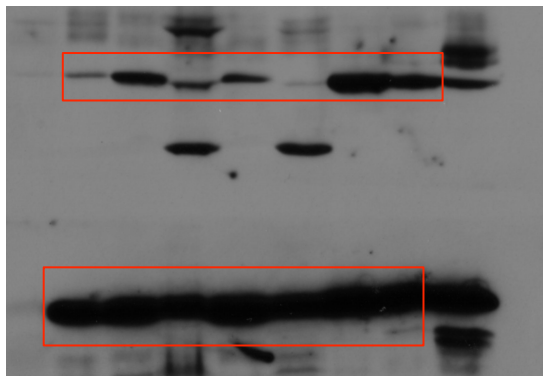

Supp Fig. 4d

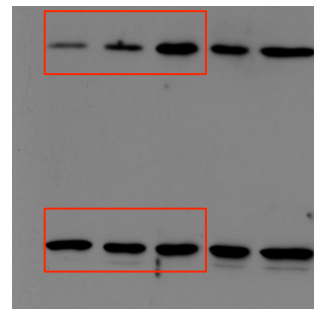

Supp Fig. 4b

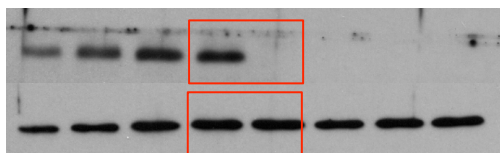

Supp Fig. 7a-c

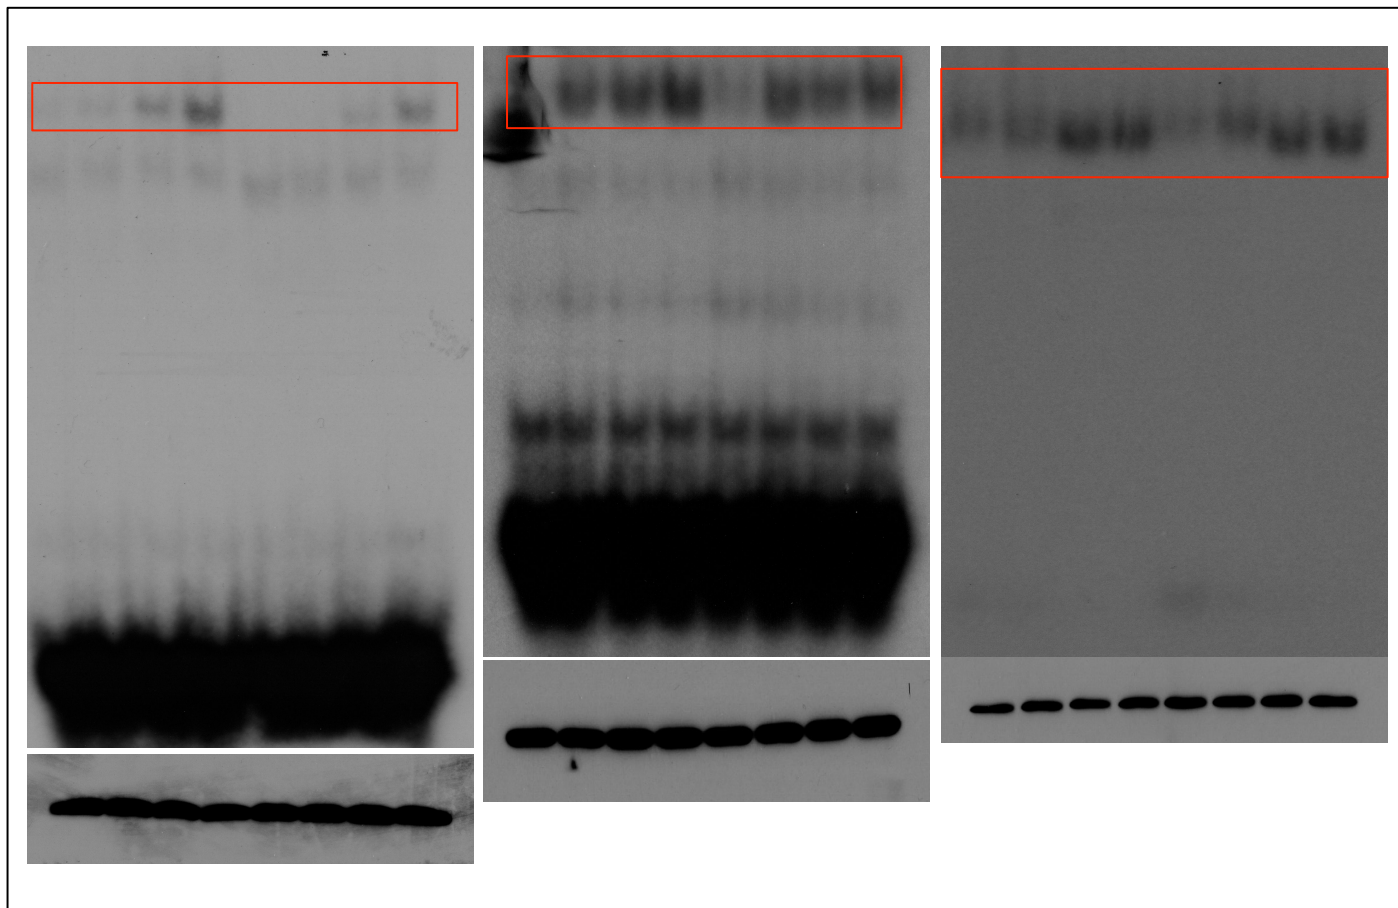

Supp Fig. 8a

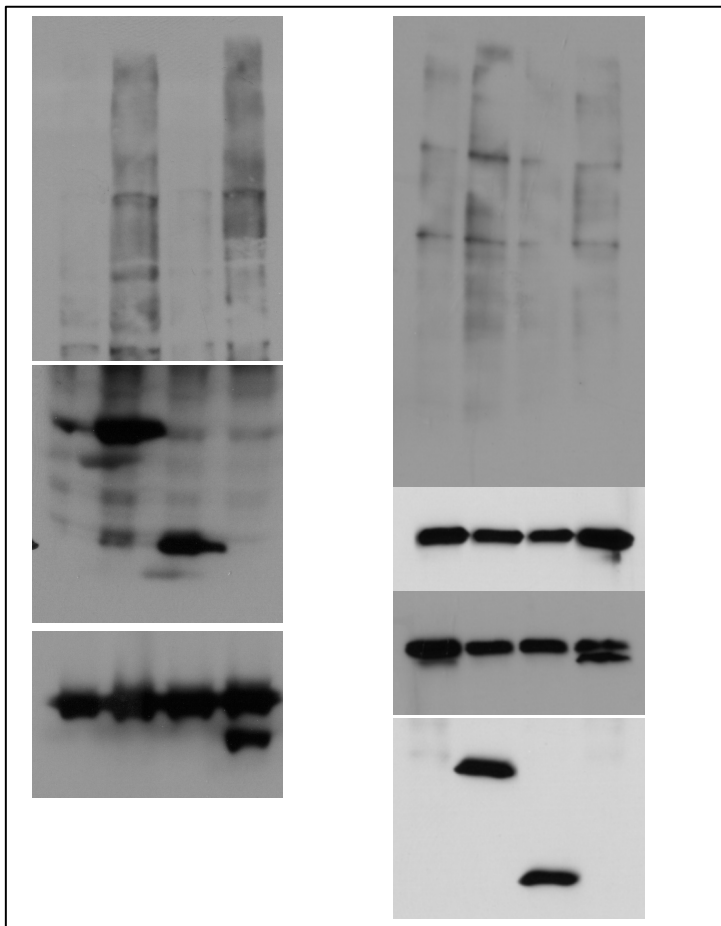

Supp Fig. 8b

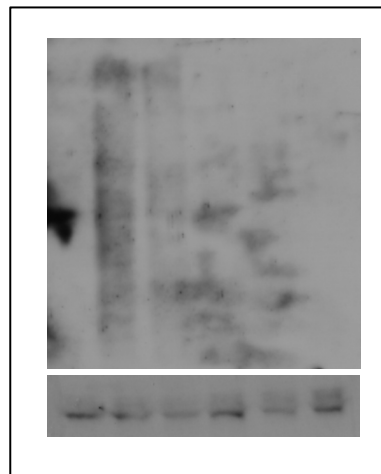

Supp Fig. 9a

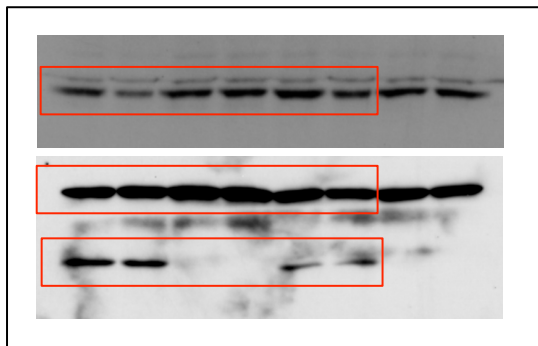

Supp Fig. 9b

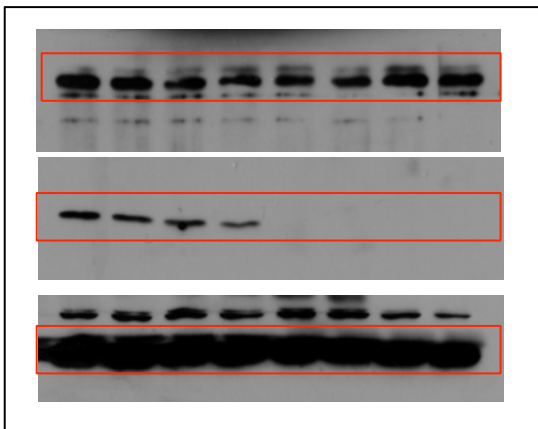

Supp Fig. 10

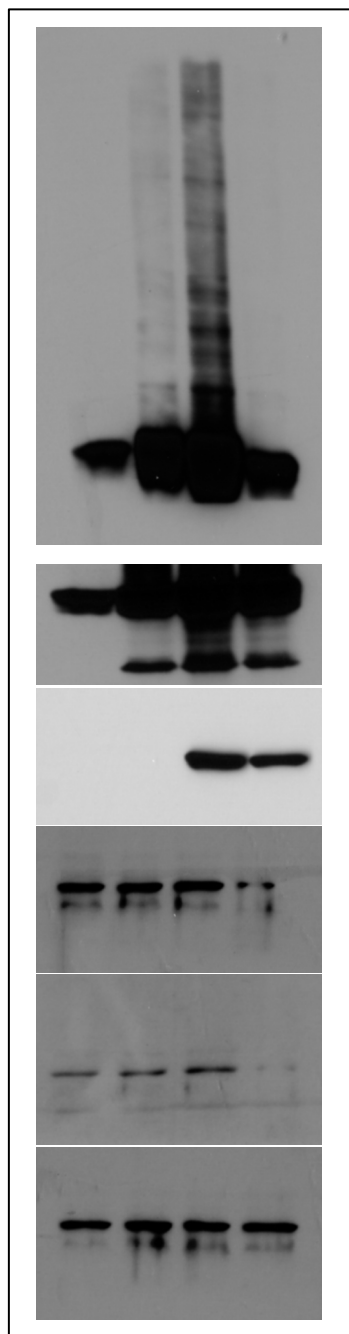

Supplement: NIHMS440352-supplement-2.pdf [file NIHMS440352-supplement-2.pdf]
