# Supplementary material
Source: PubMed Central journal article supplement (PMC3899792)
Supplement: NIHMS440352-supplement-1.pdf [file NIHMS440352-supplement-1.pdf]

## **Supplementary Information**

### **Peli1 promotes microglia-mediated CNS inflammation by regulating Traf3 degradation**

Yichuan Xiao<sup>1</sup>, Jin Jin<sup>1</sup>, Mikyoung Chang<sup>1</sup>, Jae-Hoon Chang<sup>1</sup>, Hongbo Hu<sup>1</sup>, Xiaofei Zhou<sup>1</sup>, George C. Brittain<sup>1</sup>, Christine Stansberg<sup>3,4</sup>, Øivind Torkildsen<sup>5,6</sup>, Xiaodong Wang<sup>7</sup>, Robert Brink<sup>8</sup>, Xuhong Cheng<sup>1</sup>, Shao-Cong Sun<sup>1,2,\*</sup>

#### **Contents**

**Supplementary Figures and Legends 1–12**

**Supplementary Tables 1–2**

**Supplementary Methods**

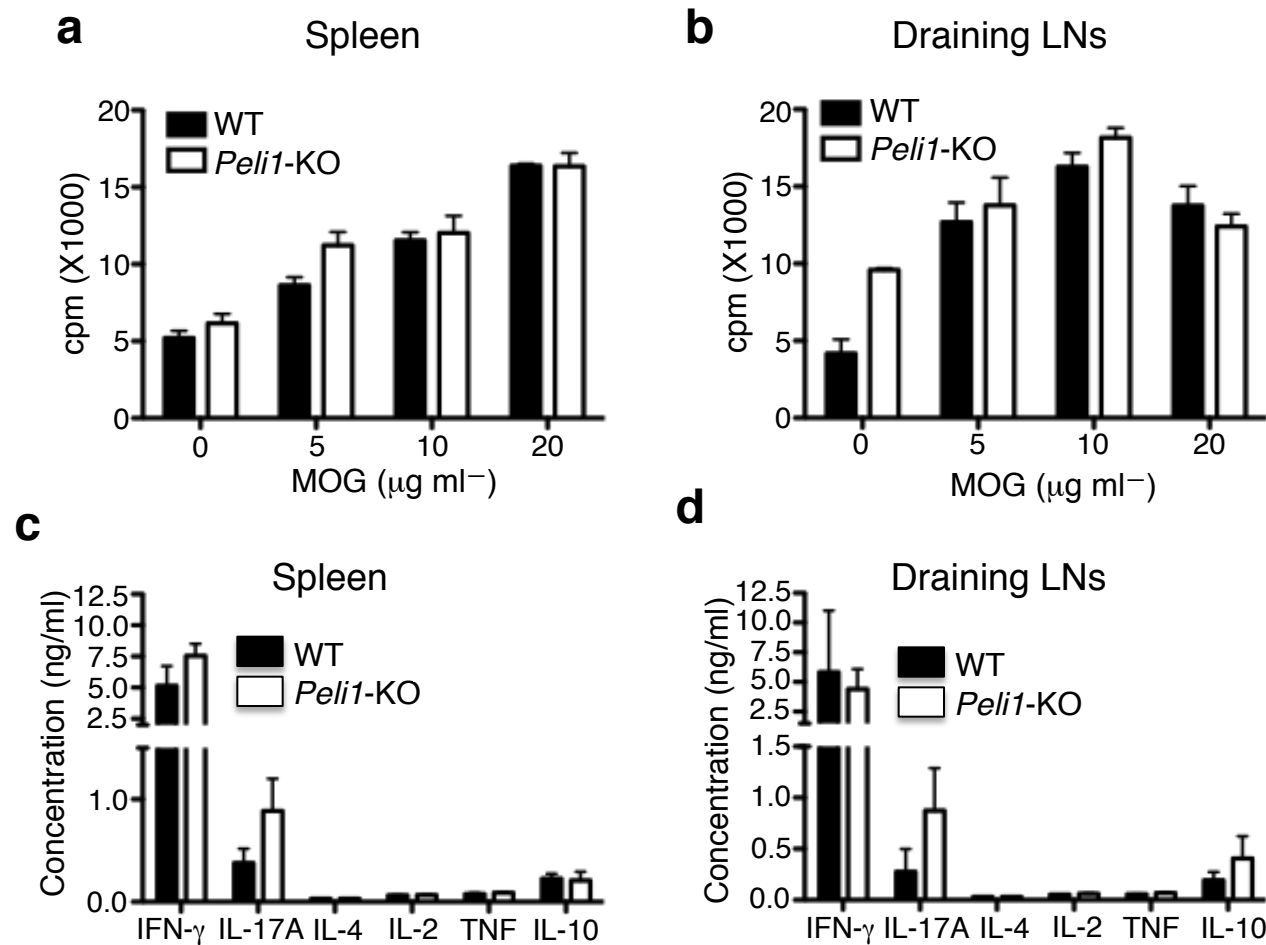

**Supplementary Fig. 1. *Peli1*-deficient T cells have normal recall response *in vitro*.** (a,b) Splenocytes or draining LNs cells isolated from MOG<sub>35-55</sub>-immunized WT and *Peli1*-KO mice were cultured in triplicate in complete medium at a density of  $2 \times 10^5$  per well in 96-well plates in the presence or absence of MOG peptide at the indicated concentration. Cell proliferation was measured after 72 h based on <sup>3</sup>H-thymidine incorporation. (c,d) ELISA of the indicated cytokines using supernatants collected from the splenocyte (c) and draining lymph node cell (d) cultures after 48 h of antigen stimulation.

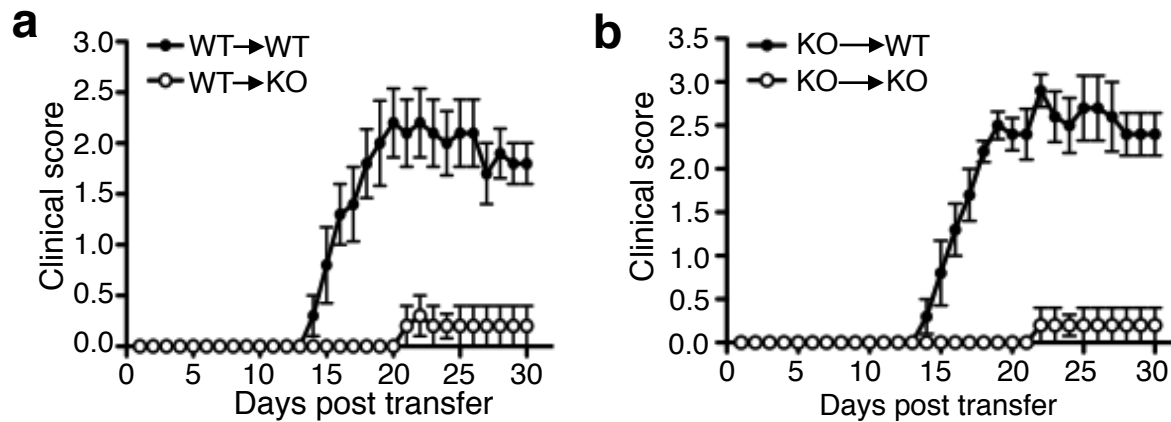

**Supplementary Fig. 2. *Peli1*-deficient T cells are competent for inducing EAE.** Splenocytes and draining lymph node cells were prepared from MOG<sub>35-55</sub>-immunized WT (a) or *Peli1*-deficient (b) mice (at day 10 post immunization) and restimulated *in vitro* for 5 days with MOG<sub>35-55</sub>. The MOG-specific T cells were transferred into sublethally irradiated WT or *Peli1* KO mice for passive EAE induction. Mean clinical scores were calculated based on multiple recipient mice (n=5/group).

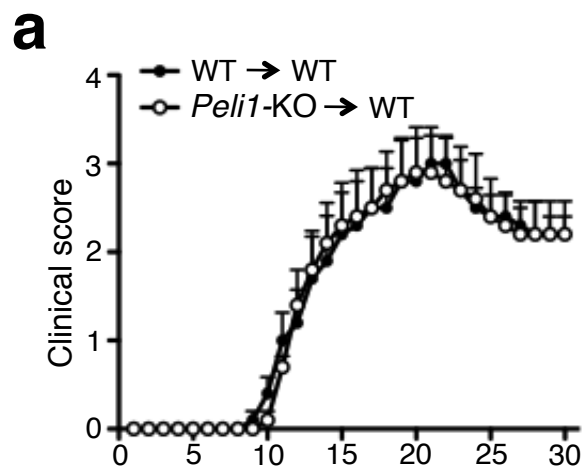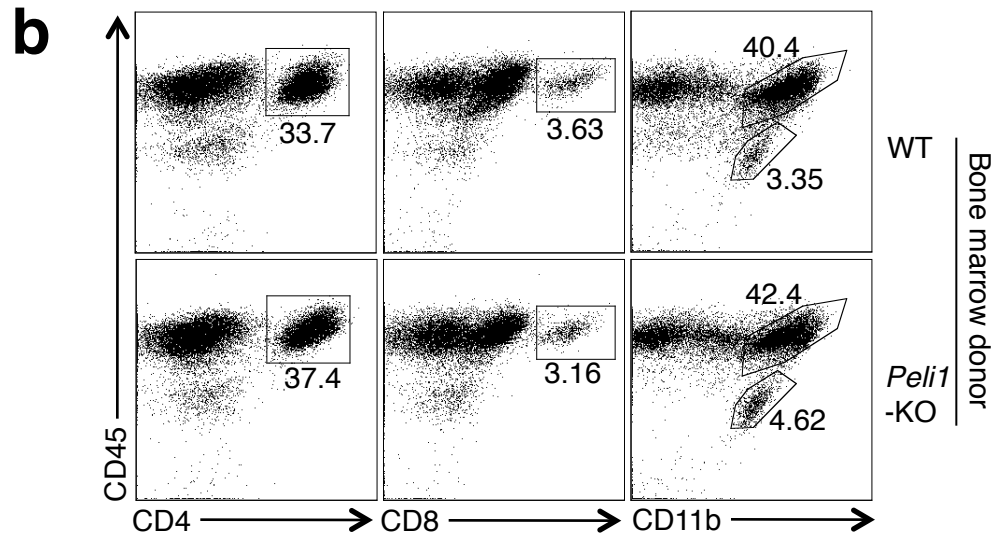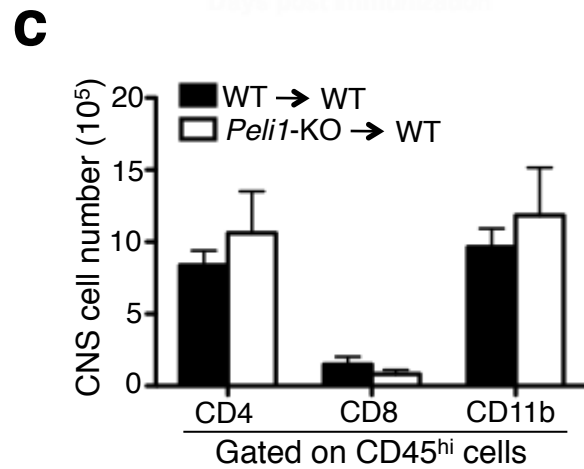

**Supplementary Fig. 3. *Peli1* is dispensable in BM cells for EAE pathogenesis.** (a) EAE induction in lethally irradiated WT recipient mice adoptively transferred with WT or *Peli1*-KO BM cells. (b, c) Flow cytometry analysis of CNS-infiltrating mononuclear cells of MOG<sub>35-55</sub>-immunized chimeric mice described in a, showing a representative plot (b) and a summary graph (c).

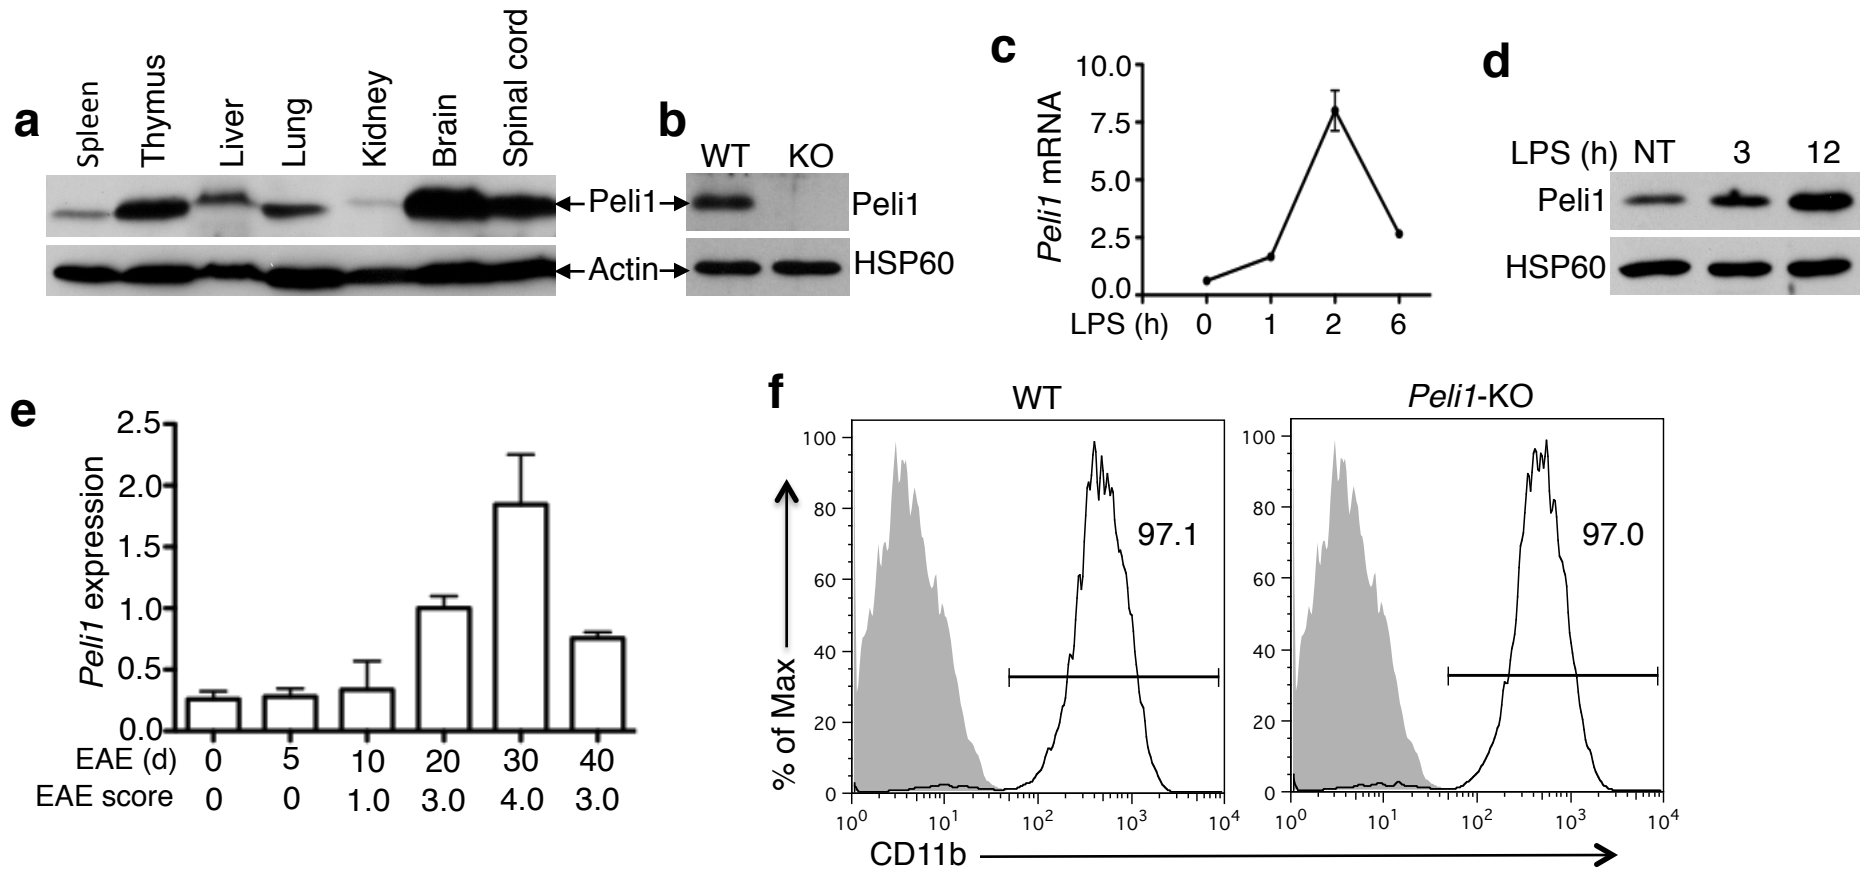

**Supplementary Fig. 4. *Peli1* is a highly expressed and predominant member of Peli family in microglia.** (a,b) Immunoblot analysis of *Peli1* expression in different tissues (a) and in WT and *Peli1*-KO microglia (b). (c,d) Real-time PCR (c) and immunoblot (d) analyses of LPS-stimulated *Peli1* expression in WT mouse microglia. (e) Real-time PCR analysis of *Peli1* mRNA in spinal cords from EAE-induced mice at the indicated days. The EAE scores of the mice were indicated. (f) Flow cytometry analysis of cultured primary microglia derived from WT and *Peli1*-KO newborn mice. Isotype control (grey).

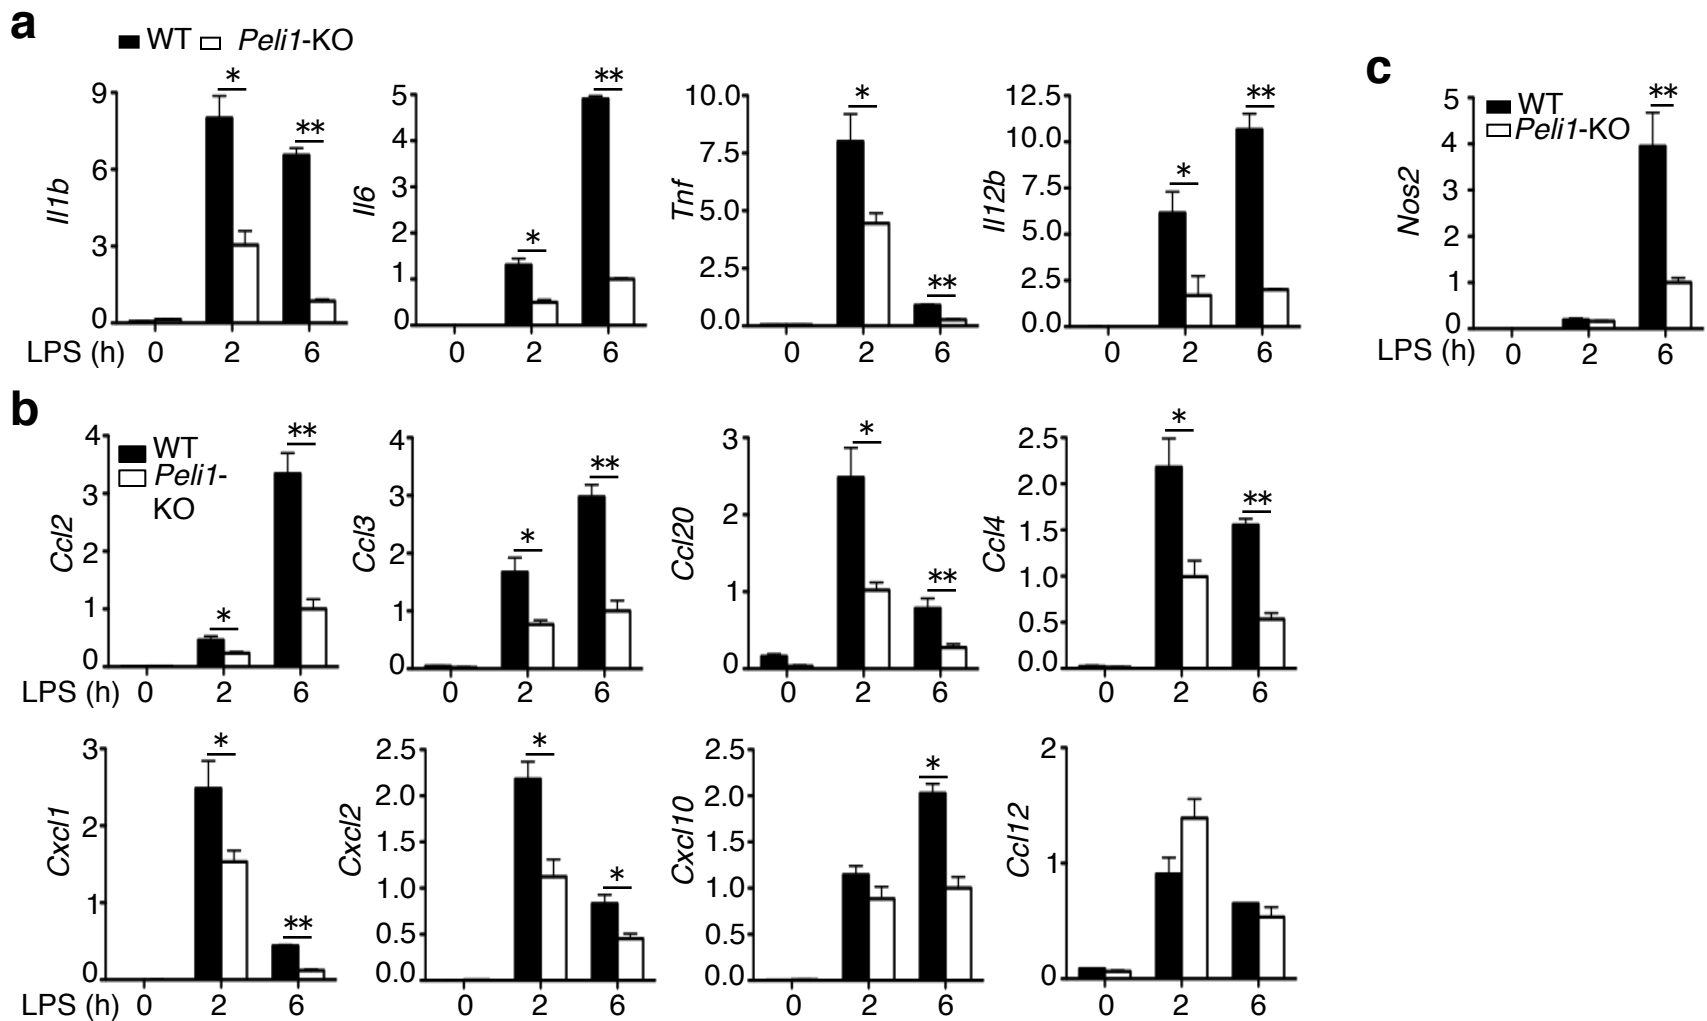

**Supplementary Fig. 5. *Peli1* mediates induction of proinflammatory cytokine and chemokine genes by LPS.** Real-time PCR analysis of relative mRNA induction for the indicated proinflammatory cytokine genes (a), chemokine genes (b), and *Nos2* gene (c) in LPS-stimulated WT and *Peli1*-KO primary microglia.

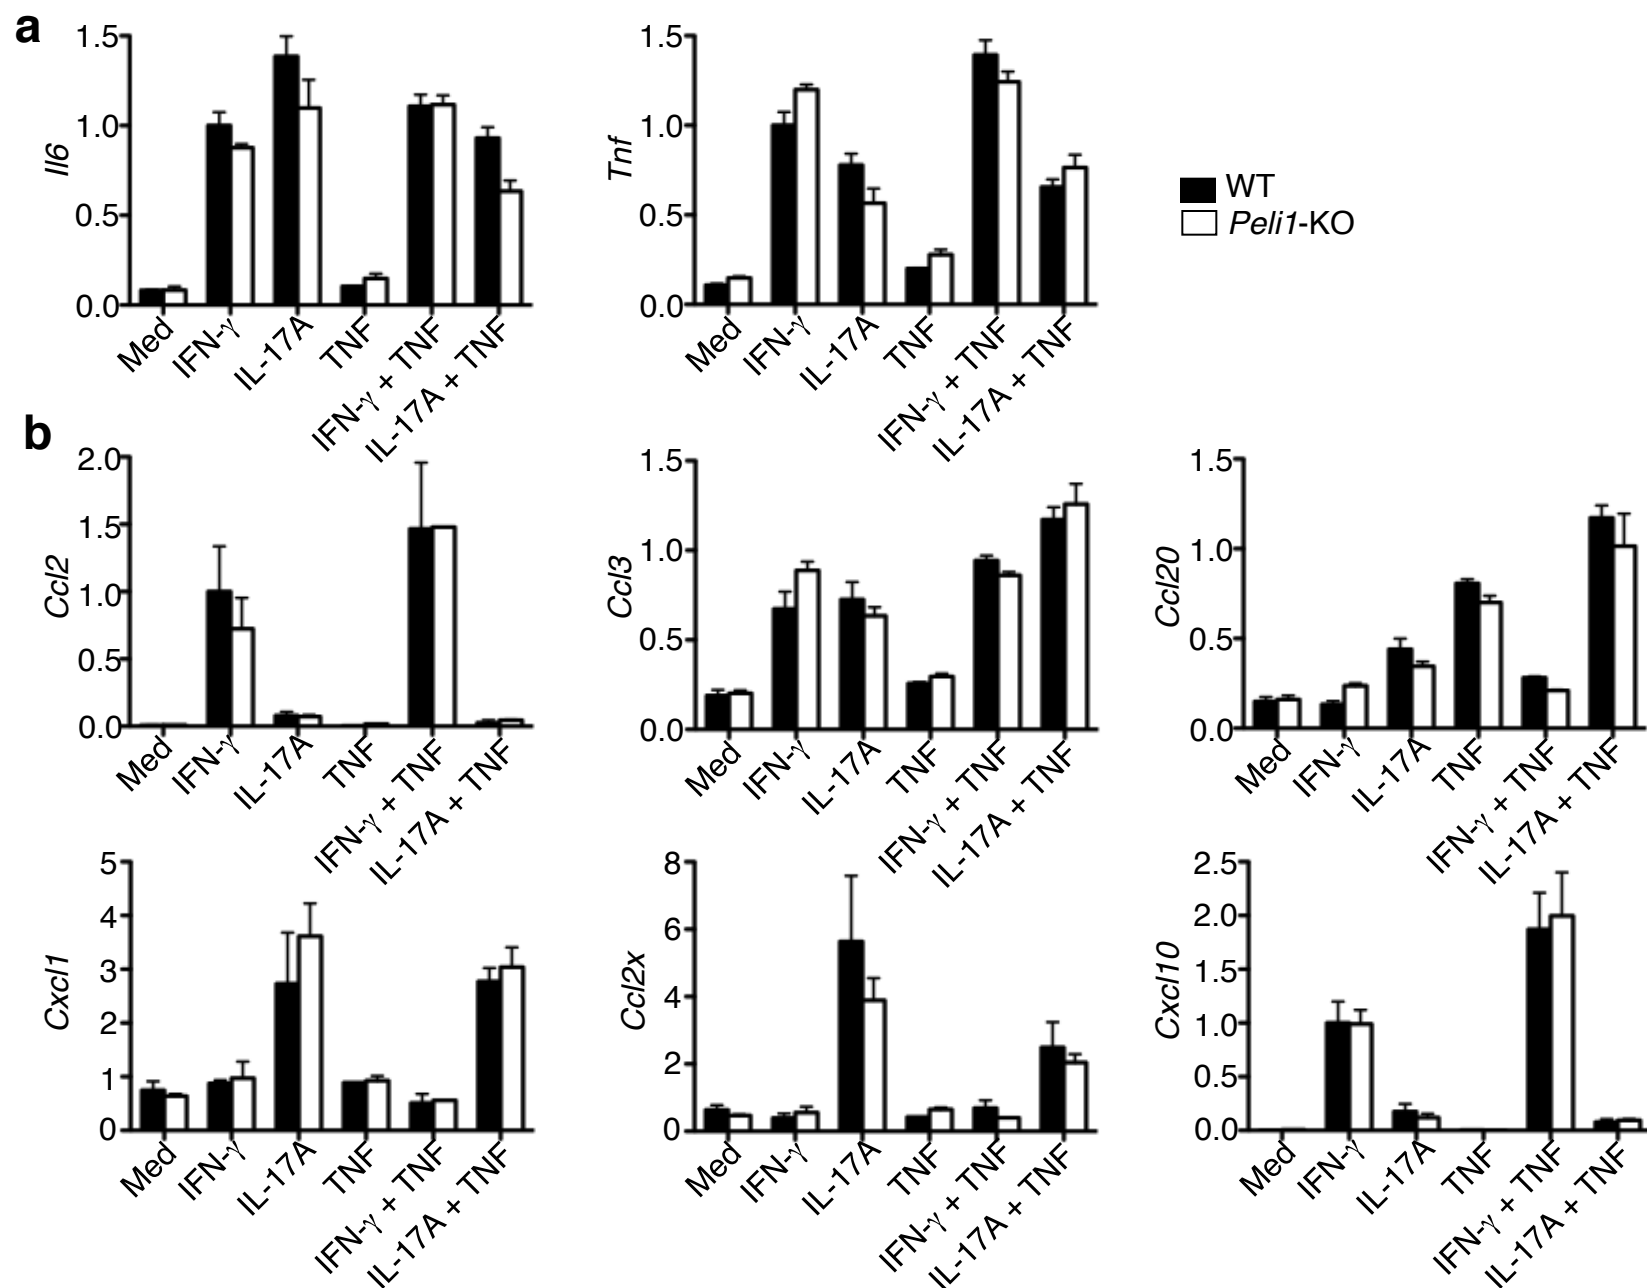

**Supplementary Fig. 6. *Peli1* is dispensable for the inflammatory response in astrocytes.** (a,b) Real-time PCR analysis of gene induction of the proinflammatory cytokines (a) and chemokines (b) in WT and *Peli1*-KO astrocytes in response to IFN- $\gamma$ , IL-17A, TNF, or in combinations as indicated.

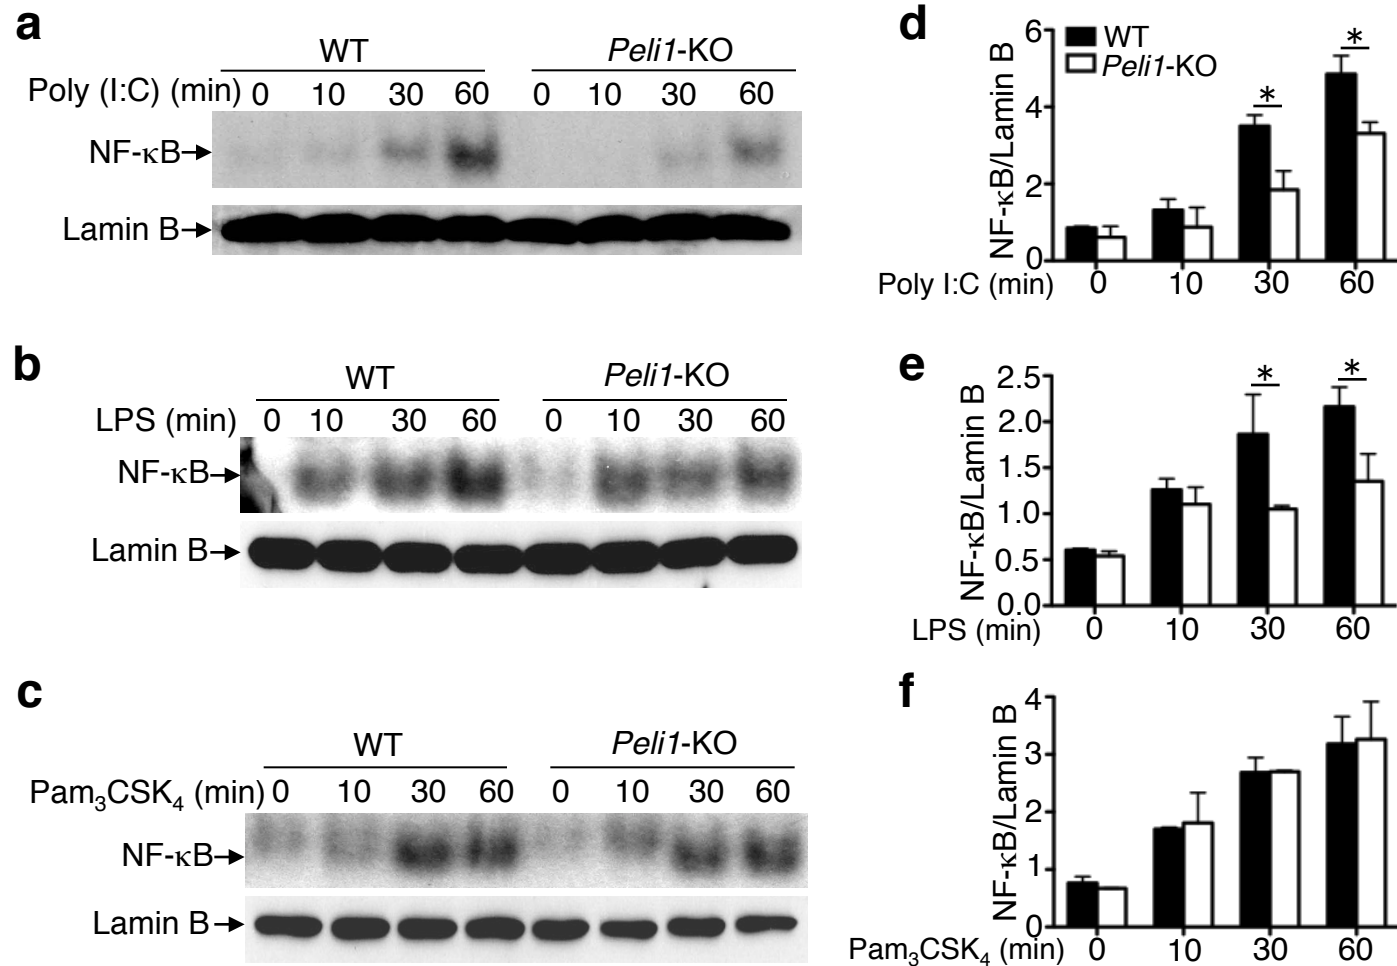

**Supplementary Fig. 7. *Peli1* regulates NF- $\kappa$ B activation by TRIF-dependent TLRs in microglia.** WT and *Peli1*-KO microglia were stimulated with poly(I:C) (10 mg ml<sup>-1</sup>) (a, d), LPS (100 ng/ml) (b, e), or Pam<sub>3</sub>CSK<sub>4</sub> (1  $\mu$ g ml<sup>-1</sup>) (c, f) for the indicated time periods, and nuclear extracts were subjected to NF- $\kappa$ B EMSAs. Lamin B immunoblots were used as loading controls (a, b, c). The NF- $\kappa$ B bands were quantified using ImageJ and presented as fold relative to an internal control Lamin B (d, e, f). Data are mean $\pm$ S.D. values, based on three independent experiments. \*P<0.05.



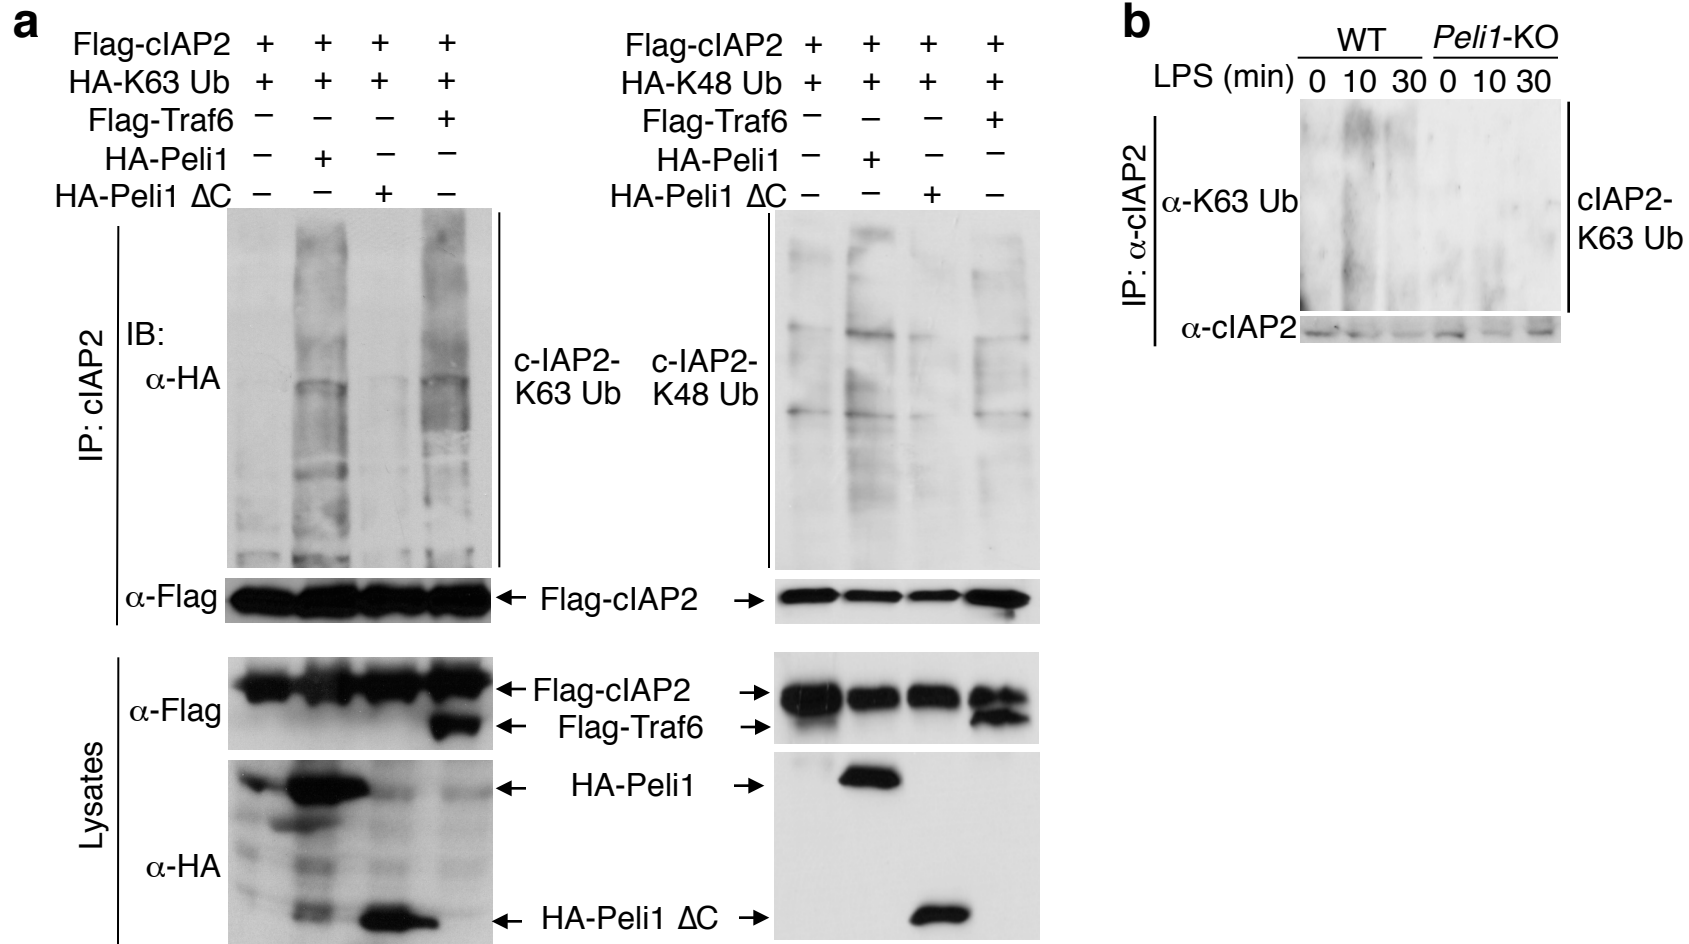

**Supplementary Fig. 8. Peli1 mediates K63 ubiquitination of c-IAP2 under both transfected and endogenous conditions.** (a) c-IAP2 was isolated by immunoprecipitation from lysates of HEK293 cells transfected with (+) or without (-) the indicated expression vectors, followed by immunoblot analysis of the K63 and K48 ubiquitinated c-IAP2 and total c-IAP2. Cell lysates were also subjected to direct immunoblot assays to examine protein expression level. Peli1ΔC lacks the C-terminal RING domain. (b) c-IAP2 was isolated by IP from the lysates of LPS-stimulated WT or *Peli1*-KO microglia. The K63-ubiquitinated and total c-IAP2 were detected by IB using the indicated antibodies.

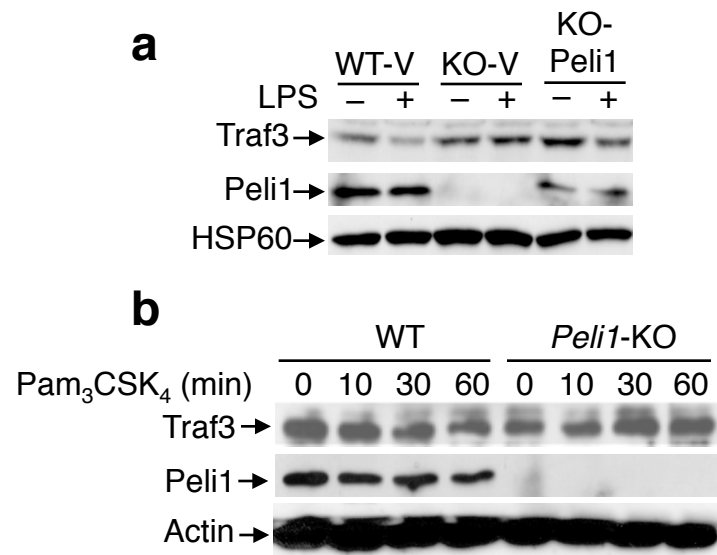

**Supplementary Fig. 9. Peli1 mediates TLR4- and TLR2-stimulated Traf3 degradation.** (a) WT and *Peli1*-KO microglia were infected with pRV-GFP empty vector (WT-V and KO-V) or the same vector encoding Peli1 (KO-Peli1). The cells were incubated with (+) or without (-) LPS for 30 min and subjected to IB to detect the indicated proteins. (b) IB analysis of Traf3, Peli1, and actin in whole-cell lysates of Pam3CSK4-stimulated WT and *Peli1*-KO microglia.

|             |   |   |   |   |
|-------------|---|---|---|---|
| clAP2 shRNA | - | - | - | + |
| clAP1 shRNA | - | - | - | + |
| HA-Ub       | + | + | + | + |
| HA-Traf3    | + | + | + | + |
| HA-Peli1    | - | + | + | + |
| Flag-IKKi   | - | - | + | + |

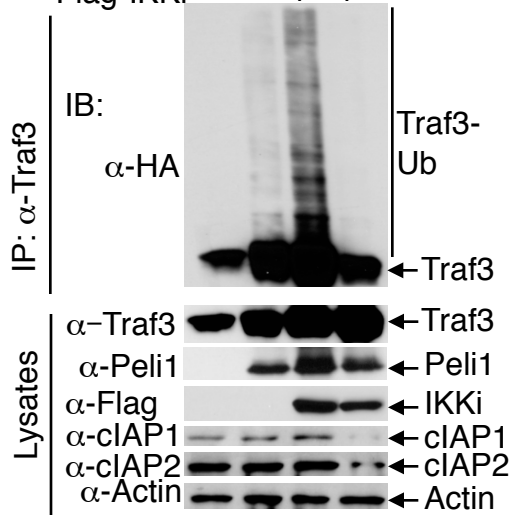

**Supplementary Fig. 10. Peli1-induced Traf3 ubiquitination requires c-IAPs.**

HEK293 cells were transfected with pLKO.1 empty vector or pLKO.1-based shRNAs for c-IAP1 and c-IAP2. The cells were then transfected with the indicated expression vectors. The cell lysates were subjected to Traf3 ubiquitination (top panels) and direct IB (lower panels) assays.

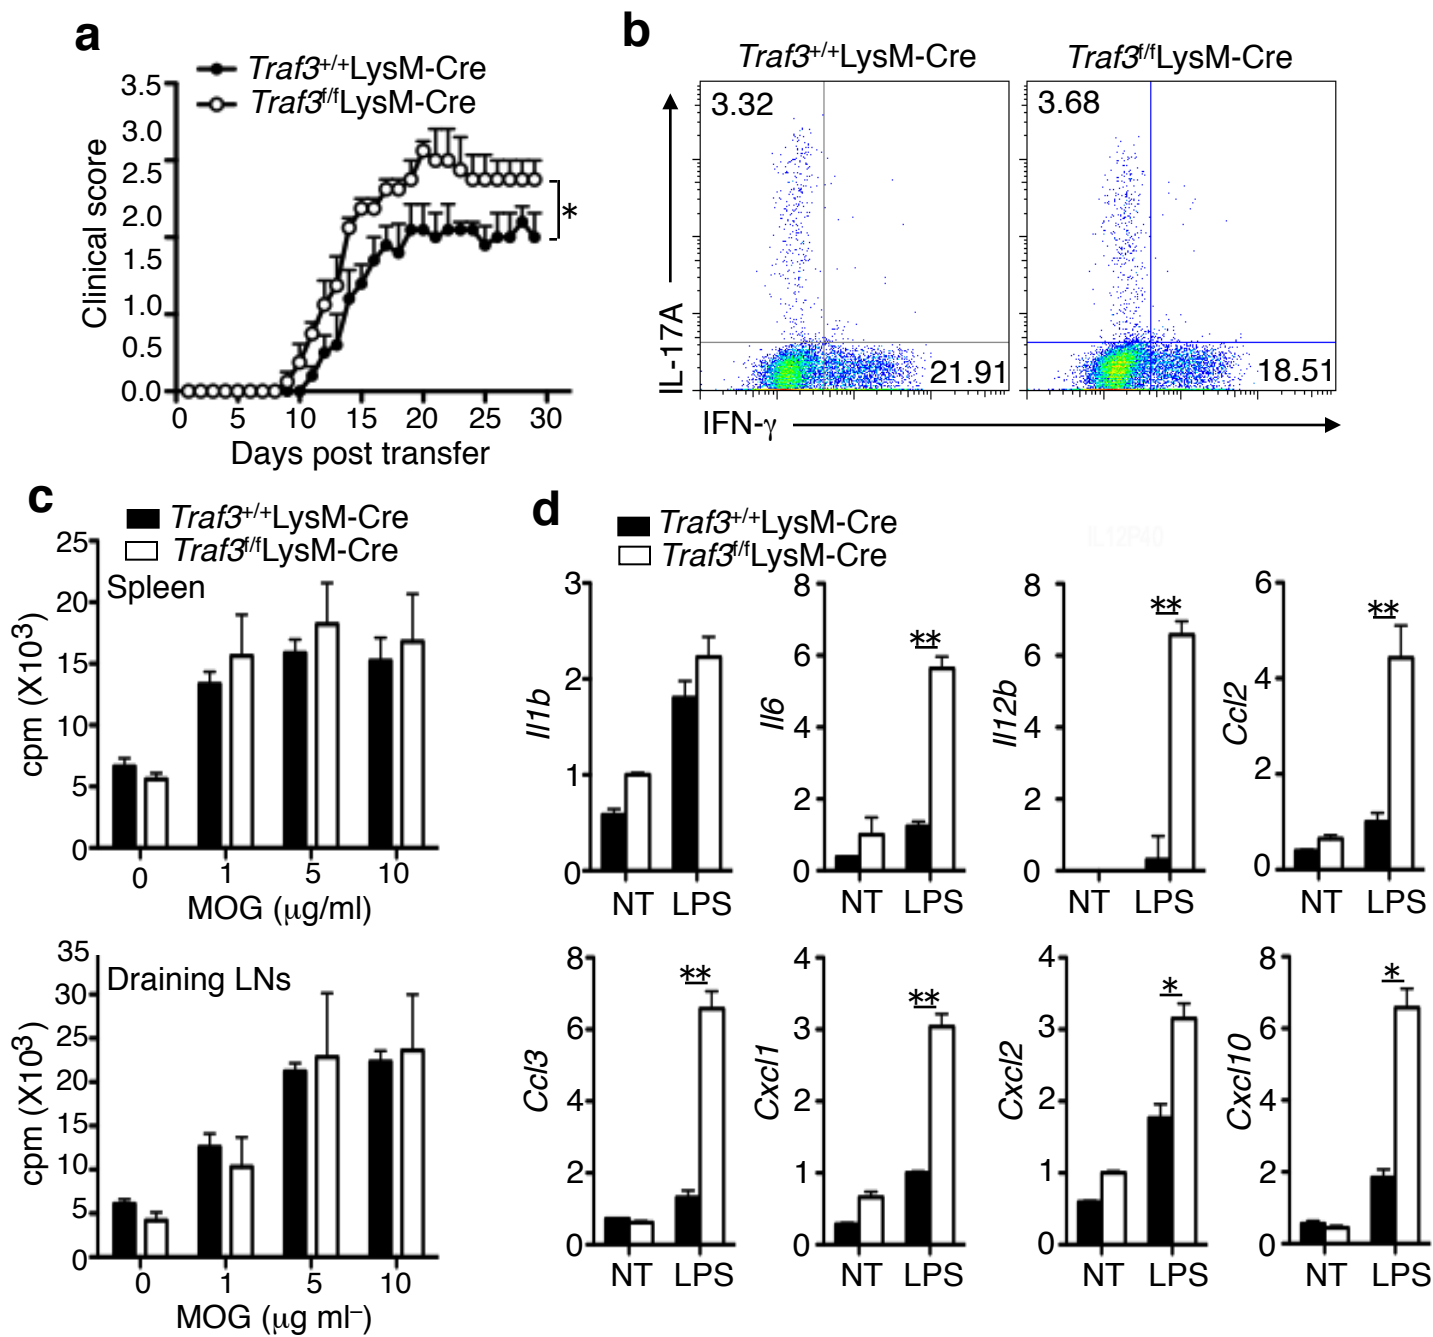

**Supplementary Fig. 11. *Traf3* deficiency in myeloid cells promotes EAE severity and microglial activation without altering peripheral T cell response.** (a) Mean clinical scores of EAE in MOG<sub>35-55</sub><sup>-</sup> immunized *Traf3*<sup>+/+</sup>LysM-Cre and *Traf3*<sup>ff</sup>LysM-Cre mice (n=5/group). (b) Flow cytometry analysis of intracellularly stained IL-17A-secreting or IFN- $\gamma$ -secreting CD4<sup>+</sup> T cells in draining LNs from MOG<sub>35-55</sub>-immunized *Traf3*<sup>+/+</sup>LysM-Cre and *Traf3*<sup>ff</sup>LysM-Cre mice. (c) Proliferation assay of the splenocytes (upper) and draining LN cells (lower) from MOG<sub>35-55</sub><sup>-</sup> immunized *Traf3*<sup>+/+</sup>LysM-Cre and *Traf3*<sup>ff</sup>LysM-Cre mice. (d) Real-time PCR analysis to measure the relative expression of the indicated genes in non-treated (NT) or LPS-stimulated *Traf3*-KO and WT microglia. \*P<0.05 and \*\*P<0.01

**Supplementary Fig. 12.**  
**Peli1 expression in grey matters of brains derived from MS and non-MS controls.** Total RNA was isolated from normal grey substance or grey substance lesion of different MS patients or the grey substances of non-MS controls. Microarray was performed, and the individual samples are placed along the x-axis, whereas the y-axis displays the normalized hybridization signal obtained from the microarrays.

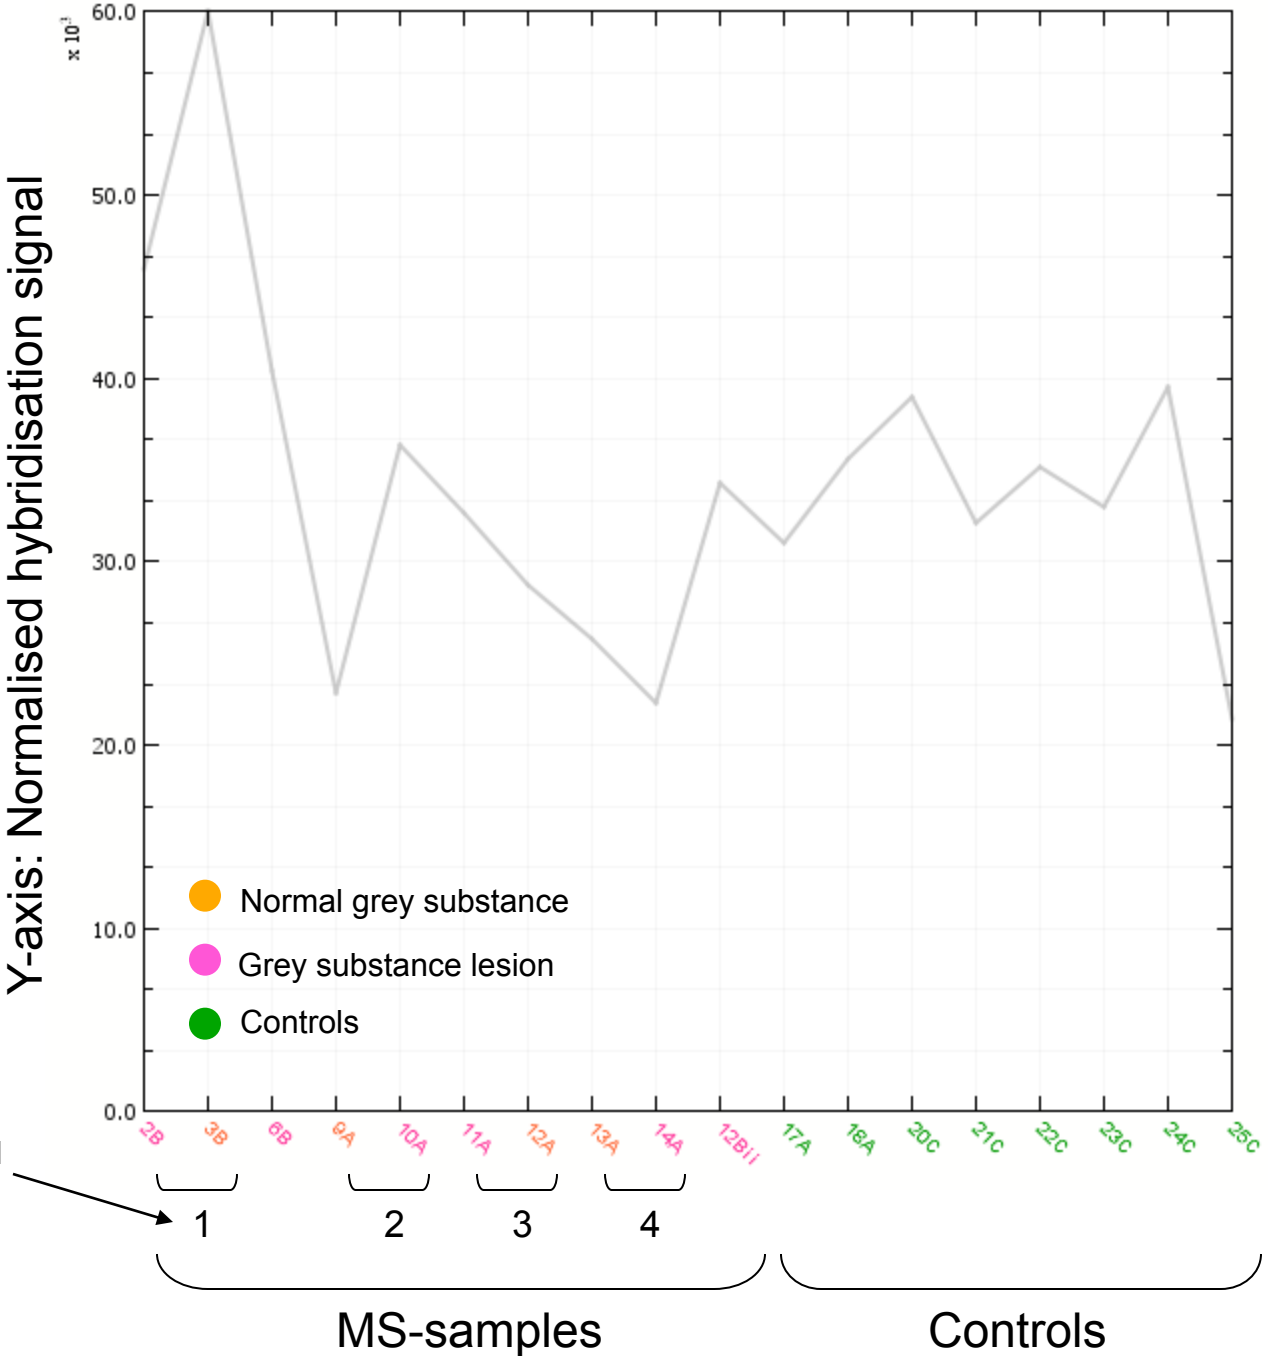

Individuals with samples from both normal appearing grey substance and grey substance lesions

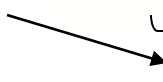

MS-samples

Controls

|    | Age (yr) | Sex | Post-mortem interval (h) | Type of MS | Disease duration (yr) | Cause of death       | Patient ID |
|----|----------|-----|--------------------------|------------|-----------------------|----------------------|------------|
| MS | 52       | F   | 8.3                      | SP         | >12                   | Respiratory failure  | 2B/3B      |
| MS | 41       | F   | 8.3                      | SP         | >11                   | Multiple sclerosis   | 6          |
| MS | 48       | F   | 8.1                      | SP         | 8                     | Euthanasia           | 9/10       |
| MS | 43       | M   | 8.3                      | SP         | 11                    | Pneumonia            | 11/12      |
| MS | 53       | F   | 10.5                     | SP         | 27                    | Euthanasia           | 13/14      |
| MS | 58       | F   | 8.1                      | NA         | NA                    | Unknown              | 12bII      |
| C  | 81       | F   | 6.4                      | -          | -                     | Euthanasia           | 17A        |
| C  | 85       | M   | 4.2                      | -          | -                     | Cardiac failure      | 18A        |
| C  | 88       | F   | 6.2                      | -          | -                     | Unknown              | 20C        |
| C  | 65       | M   | 5.0                      | -          | -                     | Cachexia/dehydration | 21C        |
| C  | 89       | F   | 15.4                     | -          | -                     | Cachexia/dehydration | 22C        |
| C  | 86       | F   | 6.3                      | -          | -                     | Cardiac failure      | 23C        |
| C  | 87       | M   | 10.2                     | -          | -                     | Pneumonia            | 24C        |
| C  | 74       | M   | 5.0                      | -          | -                     | Bronchus carcinoma   | 25C        |

**Supplementary Table 1. Clinical information of patients.** The clinical information of the multiple sclerosis (MS) patients and non-MS controls (C) is provided. SP, secondary progressive.

| Gene          | Forward primer            | Reverse primer         |
|---------------|---------------------------|------------------------|
| <i>Ccl2</i>   | GGGATCATCTTGCTGGTGAA      | AGGTCCCTGTCATGCTTCTG   |
| <i>Ccl3</i>   | GTGGAATCTTCCGGCTGTAG      | ACCATGACACTCTGCAACCA   |
| <i>Ccl20</i>  | TGTACGAGAGGCAACAGTCG      | TCTGCTCTTCCTTGCTTTGG   |
| <i>Cxcl1</i>  | CTTGACCCTGAAGCTCCCTT      | AGGTGCCATCAGAGCAGTCT   |
| <i>Cxcl2</i>  | AAAGTTTGCCTTGACCCTGA      | TCCAGGTCAGTTAGCCTTGC   |
| <i>Cxcl10</i> | CCTATGGCCCTCATTCTCAC      | CTCATCCTGCTGGGTCTGAG   |
| <i>Ccl4</i>   | GCTCTGTGCAAACCTAACCC      | GAAACAGCAGGAAGTGGGAG   |
| <i>Ccl12</i>  | TCCTCAGGTATTGGCTGGAC      | CGGACGTGAATCTTCTGCTT   |
| <i>Il1b</i>   | AAGCCTCGTGCTGTCCGACC      | TGAGGCCCAAGGCCACAGGT   |
| <i>Il6</i>    | CACAGAGGATACCACTCCCAACA   | TCCACGATTTCCAGAGAACA   |
| <i>Tnf</i>    | CATCTTCTCAAAATTCGAGTGACAA | CCAGCTGCTCCTCCACTTG    |
| <i>Il12b</i>  | GGAGACACCAGCAAAACGAT      | TCCAGATTCAGACTCCAGGG   |
| <i>Nos2</i>   | GTGGTGACAAGCACATTTGG      | AAGGCCAAACACAGCATACC   |
| <i>Peli1</i>  | CCTTGTCATGTAAGTTTCTC      | CAGAGTTCAGAAGTCTGGAAC  |
| <i>Peli2</i>  | CACTCACGGTGGGAATTCAGAC    | GGAGCTATCACCTATGCTCACC |
| <i>Peli3</i>  | GCATGTGGGACTCTGCCTGCT     | GATCAAGATCTCAGTGACCCTC |
| <i>Arg1</i>   | TTTTTCCAGCAGACCAGCTT      | AGAGATTATCGGAGCGCCTT   |
| <i>Actb</i>   | CGTGAAAAGATGACCCAGATCA    | CACAGCCTGGATGGCTACGT   |

**Supplementary Table 2. The gene-specific primers used for real-time RT-PCR for detecting the indicated mouse mRNAs.**
